# Supplementary material
Source: Springer Nature journal article supplement (https://www.springermedizin.de/resource/supplementary/12955_2011_967_MOESM3_ESM.pdf/9558800)

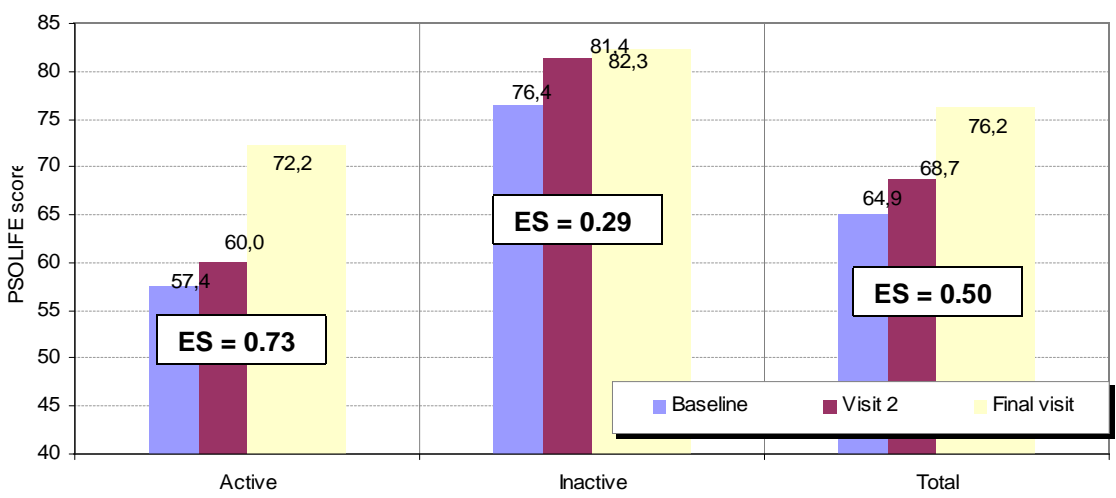

Supplement: MOESM3 [file 9558800]
